# Supplementary material
Source: publisher figshare collection journal article supplement (https://springernature.figshare.com/ndownloader/files/14604776)
Supplement: Supplementary file [file 14604776]

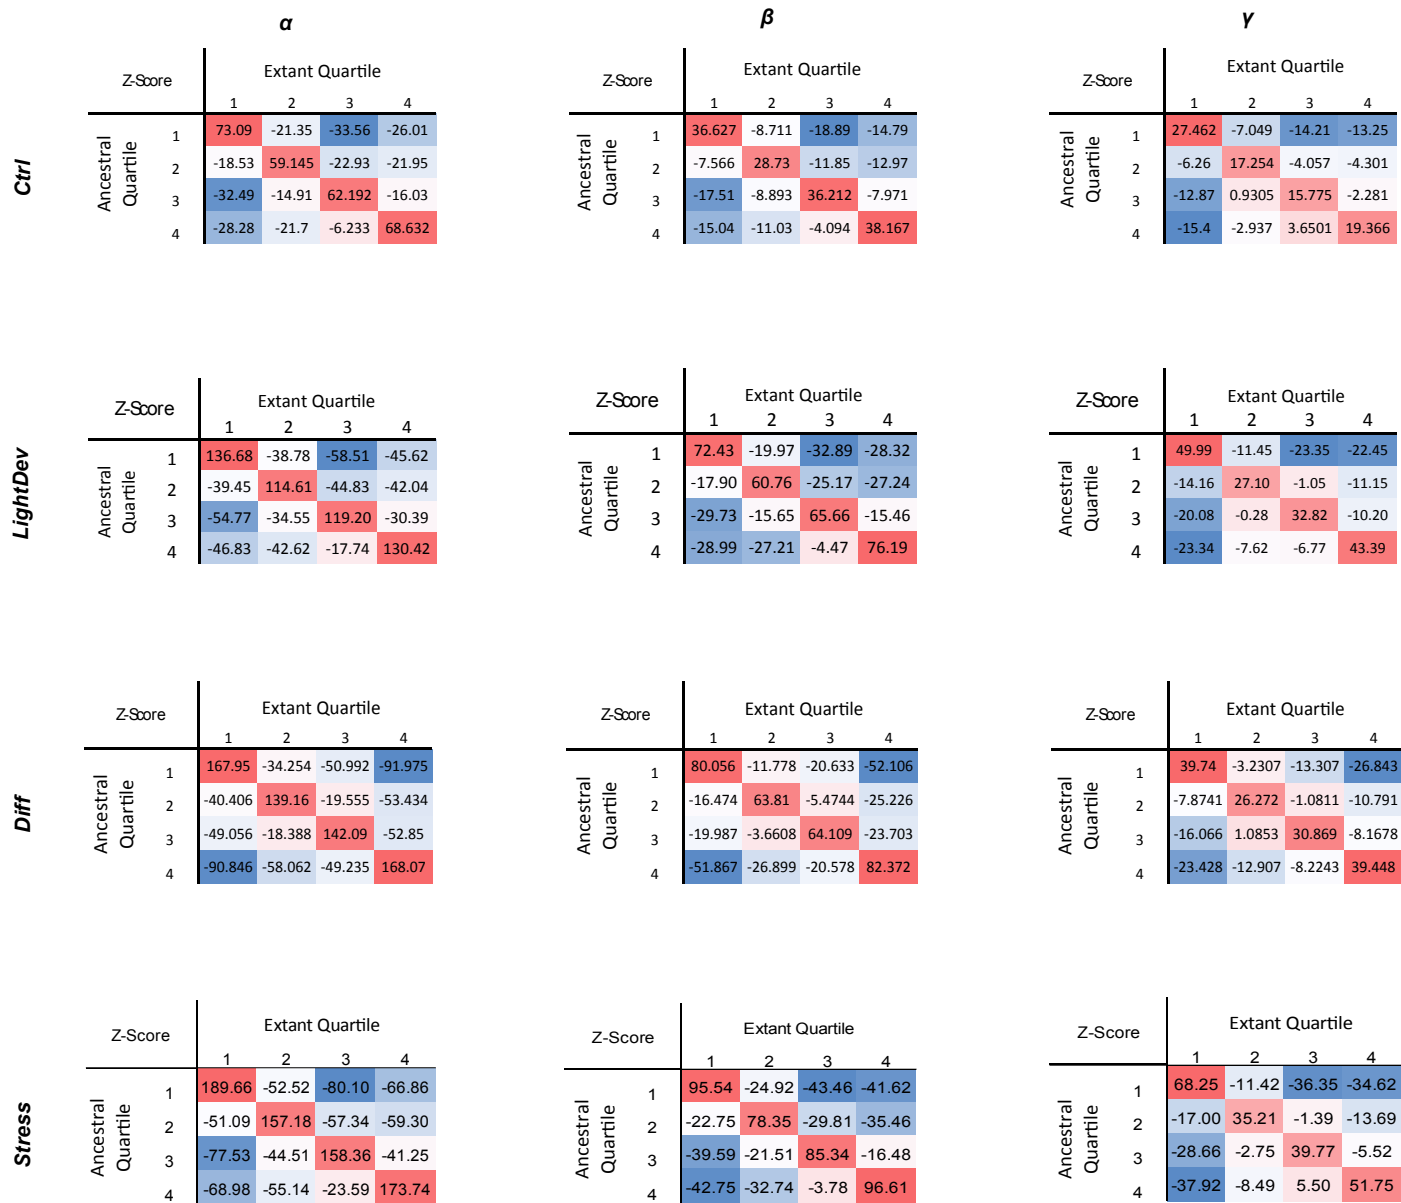

**Figure S3.** Difference in expression quartile of individual TF duplicates compared to their ancestral state for all four expression subsets (Ctrl, LightDev, Diff, and Stress) across each WGD event ( $\alpha$  = left,  $\beta$  = middle,  $\gamma$  = right). Heatmaps show the z-scores of the observed frequency of each difference compared to the expected frequency. Color correlates with the magnitude of the z-score, with darker red values indicating counts further above random expectation and darker blue values indicating counts further below random expectation.
